# Supplementary material for: Evidence That Lipopolisaccharide May Contribute to the Cytokine Storm and Cellular Activation in Patients with Visceral Leishmaniasis
Source: PubMed Central journal article supplement (PMC3134430; doi:10.1371/journal.pntd.0001198), 2011-07-12

A

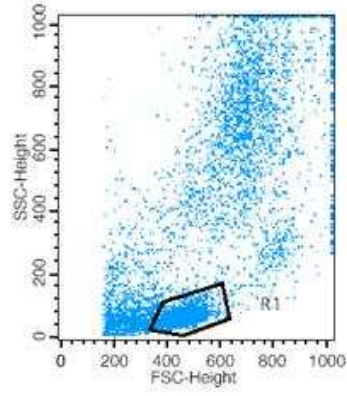

B

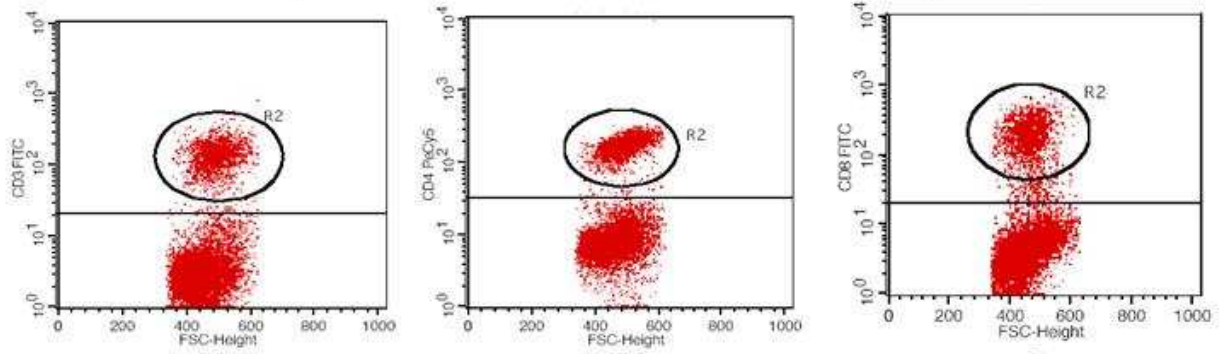

C

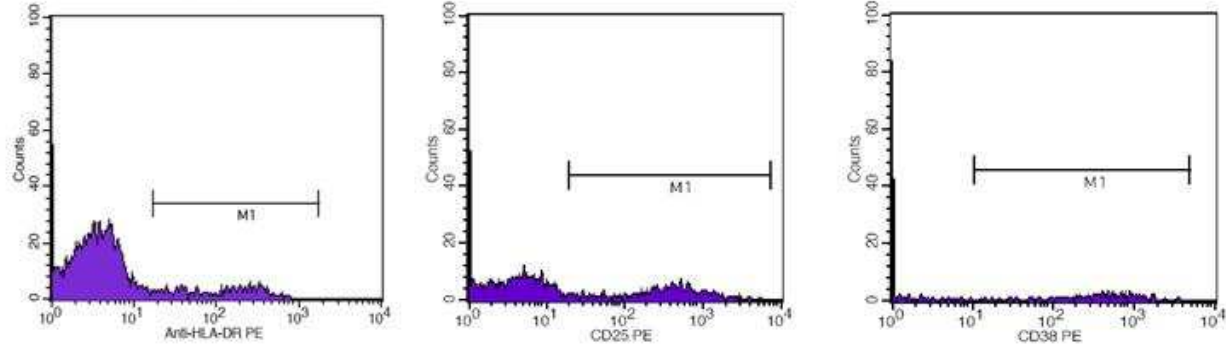

Supplement: pntd.0001198.s001.pdf [file pntd.0001198.s001.pdf]
